# Supplementary material for: Bamboo derived N-doped carbon as a bifunctional electrode for high-performance zinc–air batteries
Source: Royal Society of Chemistry journal article supplement (doi:10.1039/d3se00315a), 2023-01-01
Supplement: d3se00315a1.pdf [file d3se00315a1.pdf]

## Supporting Information

# Bamboo Derived N-doped Carbon as a Bifunctional Electrode for High-performance Zinc-air Batteries

*Peng Cui,<sup>‡a</sup> Tingzhen Li,<sup>‡a</sup> Xiao Chi,<sup>‡a</sup> Wu Yang,<sup>a</sup> Zehong Chen,<sup>a</sup> Wenjia Han,<sup>b</sup>*

*Ruidong Xia,<sup>c</sup> Shimelis Admassie,<sup>d</sup> Emmanuel Iheanyichukwu Iwuoha,<sup>e</sup> and Xinwen*

*Peng<sup>\*a</sup>*

<sup>a</sup> State Key Laboratory of Pulp and Paper Engineering, South China University of Technology, Guangzhou, China, 510640

<sup>b</sup> State Key Laboratory of Biobased Material and Green Papermaking, Qilu University of Technology (Shandong Academy of Sciences), Jinan, China, 250353

<sup>c</sup> School of Materials Science and Engineering, Nanjing University of Posts and Telecommunications, Nanjing, China, 210023

<sup>d</sup> Department of Chemistry, Addis Ababa University, PO Box 1176, Addis Ababa, Ethiopia

<sup>e</sup> Key Laboratory for NanoElectrochemistry, 4th Floor Chemical Sciences Building, University of the Western Cape, Robert Sobukwe Road, Bellville 7535, Cape Town, South Africa

## Supplementary Figures and Tables

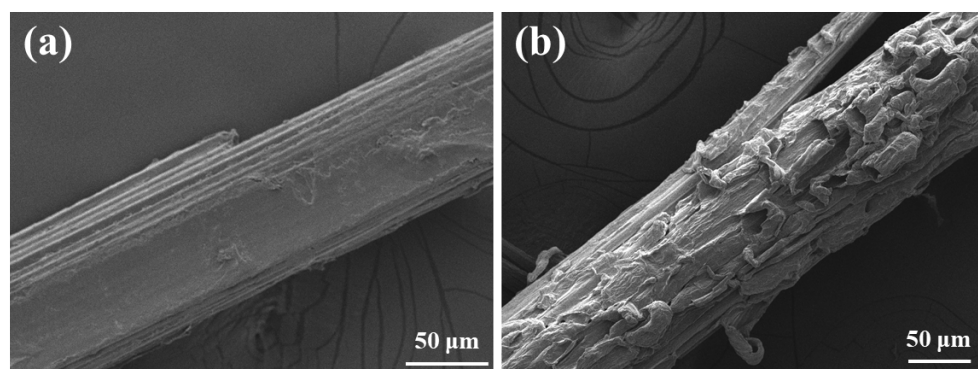

**Figure S1.** SEM of (a) bamboo sliver before and (b) after pretreatment.

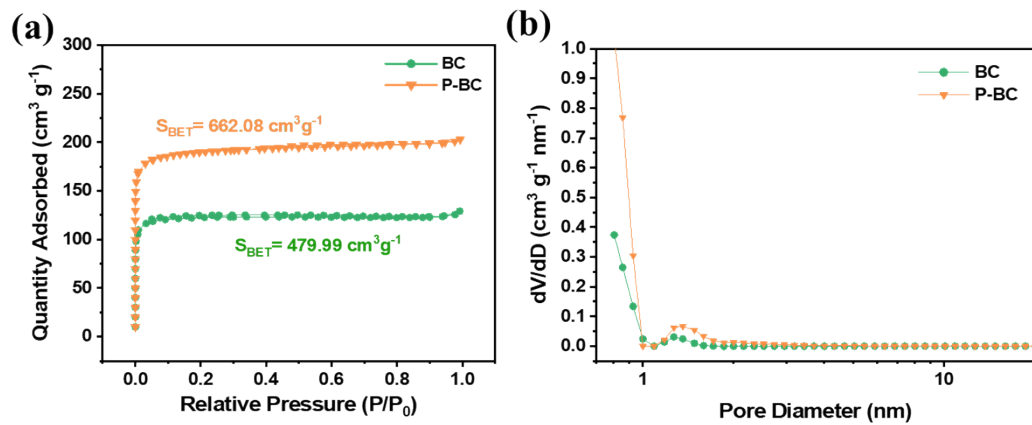

**Figure S2.** (a) BET N<sub>2</sub> adsorption/desorption isotherms and (b) DFT pore size distribution curves of BC and P-BC.

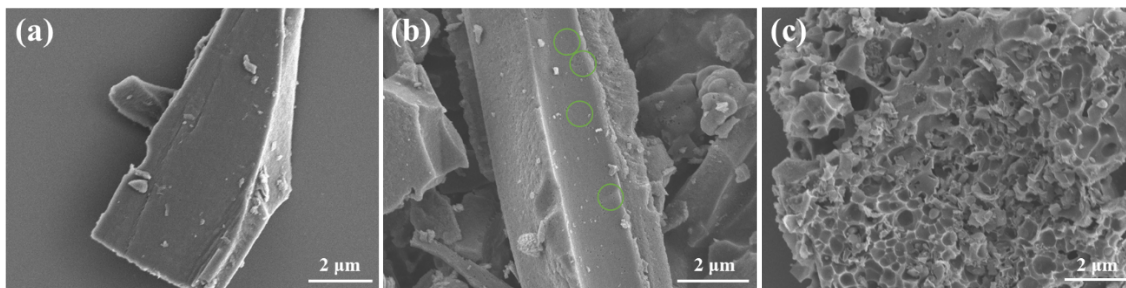

**Figure S3.** SEM under high magnification of (a) BC and (b) NBC (c) NPBC after grinding.

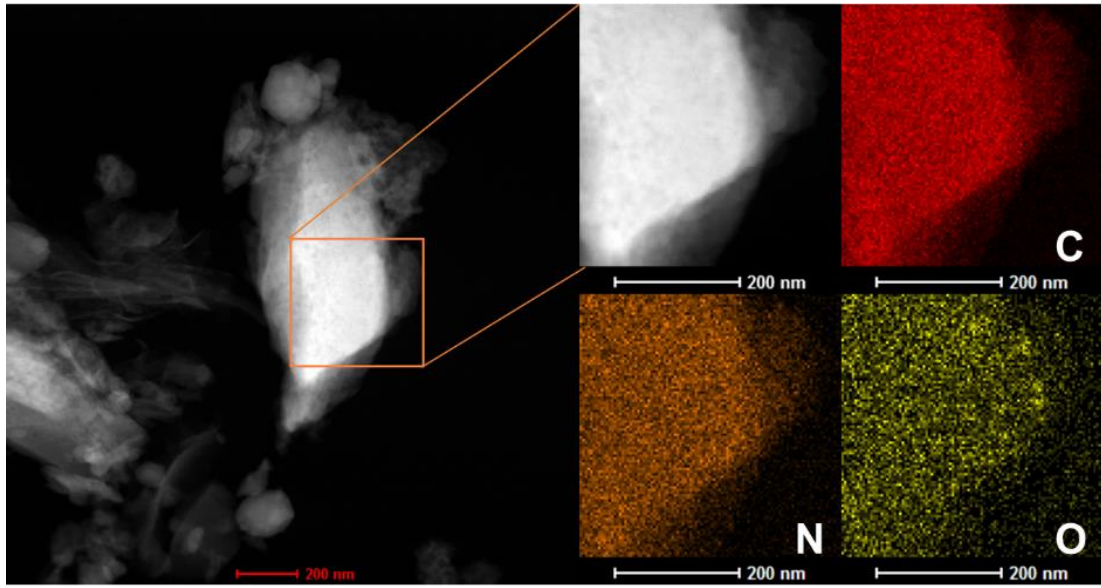

**Figure S4.** HAADF-STEM and corresponding EDS elemental mapping images for C, N, and O of NPBC.

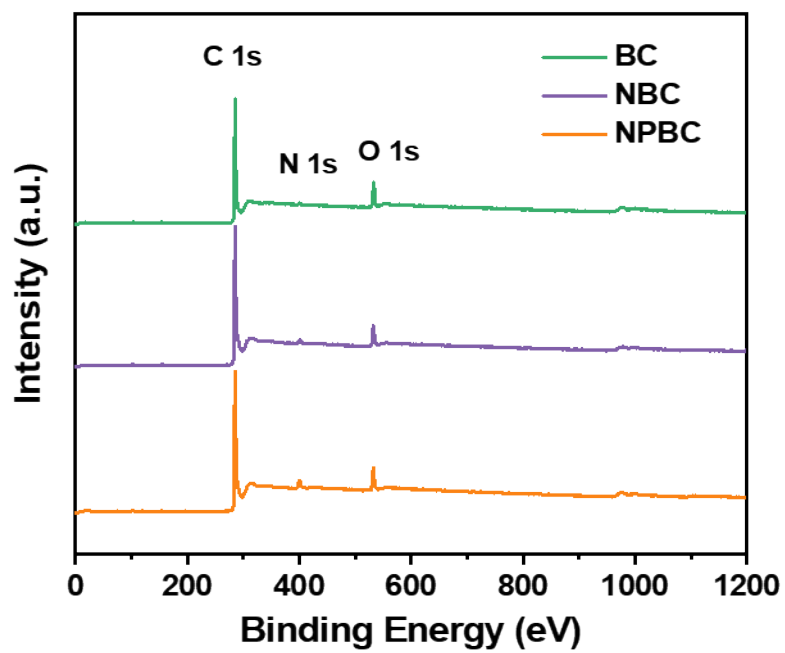

**Figure S5.** XPS survey spectra of BC, NBC, and NPBC.

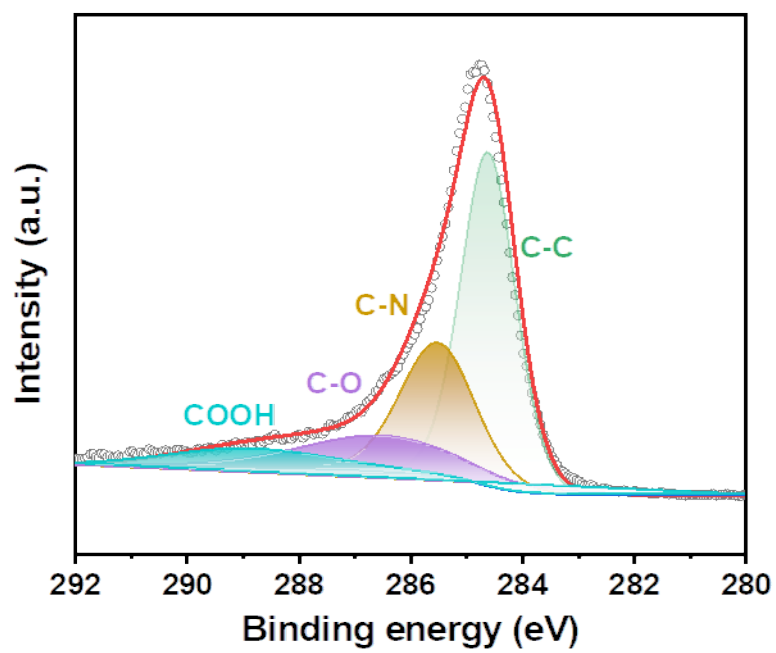

**Figure S6.** The high-resolution C 1s spectra of NPBC.

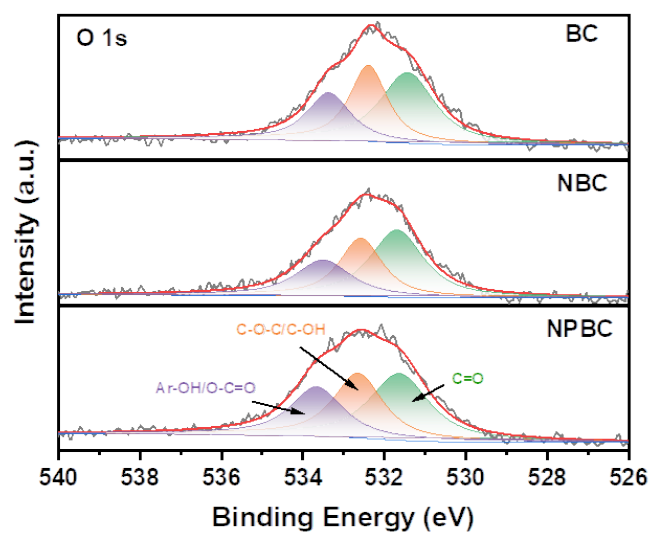

**Figure S7.** The high-resolution O 1s spectra of BC, NBC and NPBC. In the high-resolution XPS spectrum of O 1s, three peaks in all samples at binding energies of 531.3, 532.6 and 533.5 eV are indexed to C=O aromatic carbonyl groups, C-OH hydroxylic groups or C-O-C ether groups and Ar-OH aromatic alcohols or O-C=O ester groups, respectively.



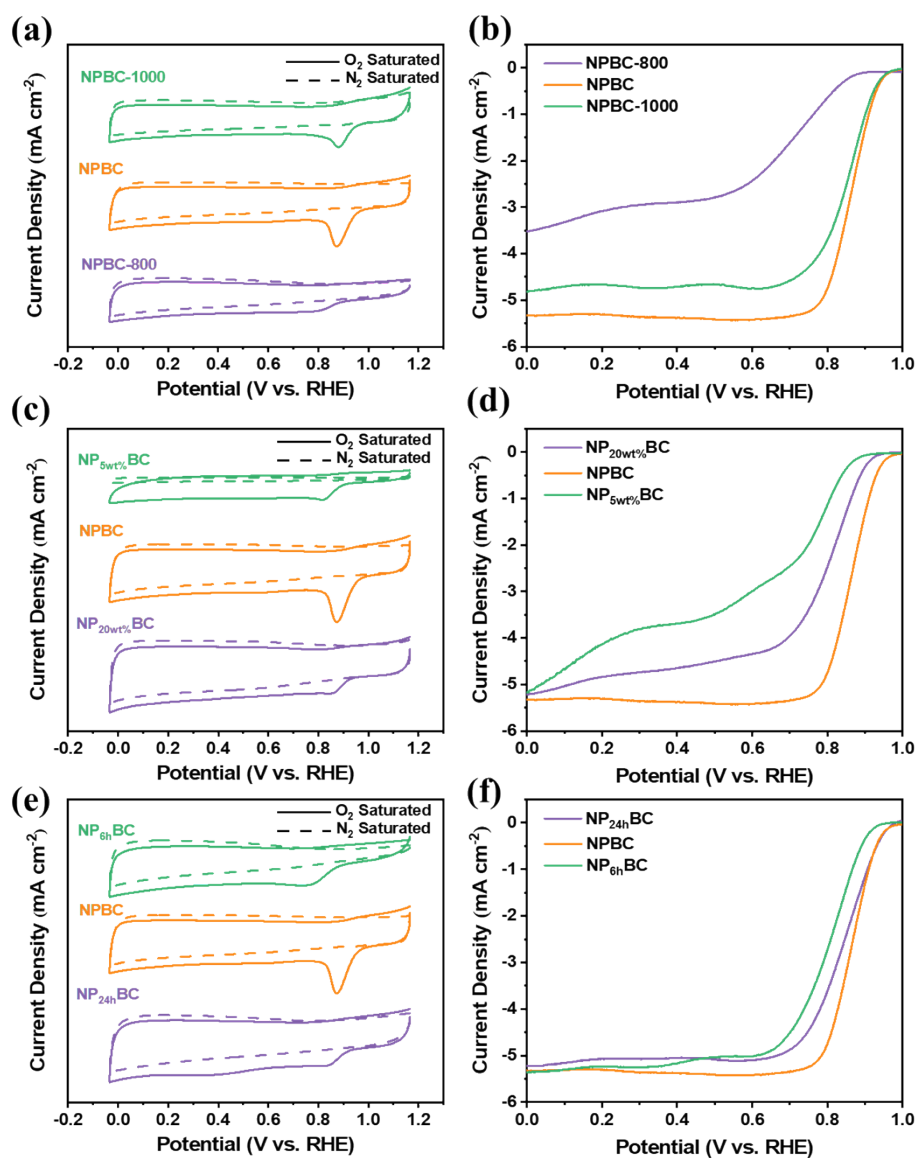

**Figure S8.** Comparison of CV and LSV of samples under different treatment conditions (NP<sub>x</sub>BC-T, X means the concentration of sodium hydroxide or pretreatment time, T means the carbonization temperature).

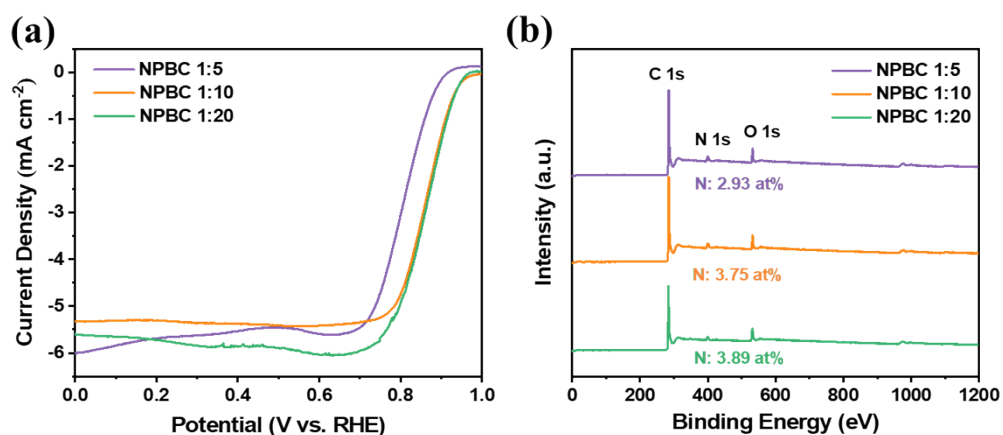

**Figure S9.** (a) LSV and (b) XPS survey spectra of materials prepared with different ratios of ammonium chloride.

As shown in Figure S9, We found that after increasing the amount of  $\text{NH}_4\text{Cl}$  (1:20), the N content of the catalyst did not show a substantial increase, and also the catalytic performance ( $E_{\text{onset}}$ ,  $E_{1/2}$ ) did not improve greatly. Therefore, it is better to use a ratio of 1:10 in order to be greener and conserve resources.

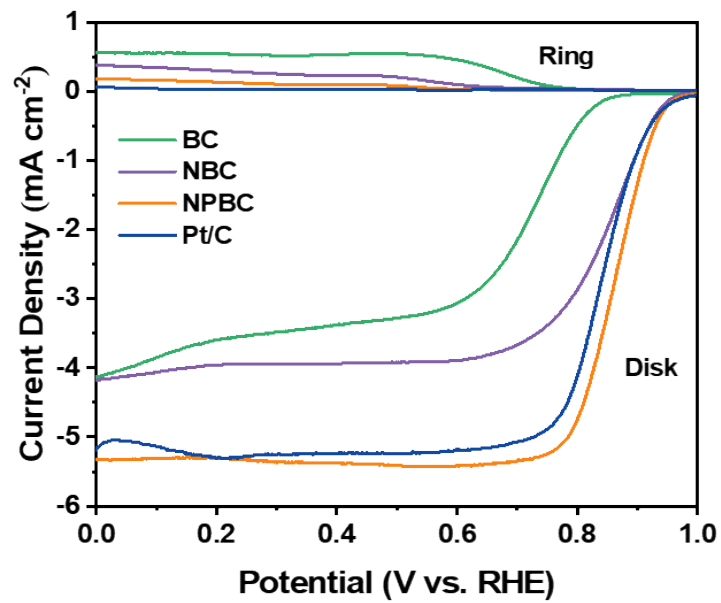

**Figure S10.** (a) RRDE curves of all samples.

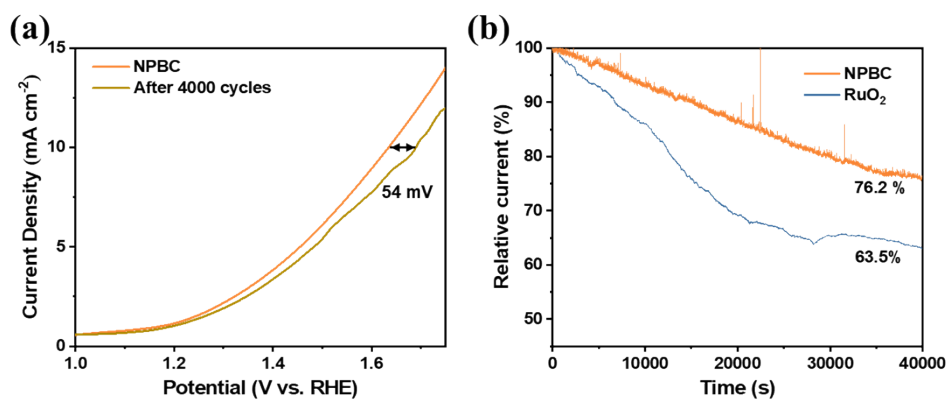

**Figure S11.** (a) the OER performance of the catalyst after Adt; (b) Chronoamperometric responses of the NPBC and RuO<sub>2</sub> at 1.5 V.

The CV accelerating durability tests (ADT) were conducted at a scanning rate of 50 mV s<sup>-1</sup> from 1 to 1.6 V in an O<sub>2</sub>-saturated 0.1 M KOH solution. After 4000 cycles, the OER overpotential of NPBC increased by 54 mV. In addition, after chronoamperometry tests for 40000 s, NPBC displays a current retention of 76.2 %, which is higher than that of benchmark RuO<sub>2</sub> catalyst (63.5 % current retention).

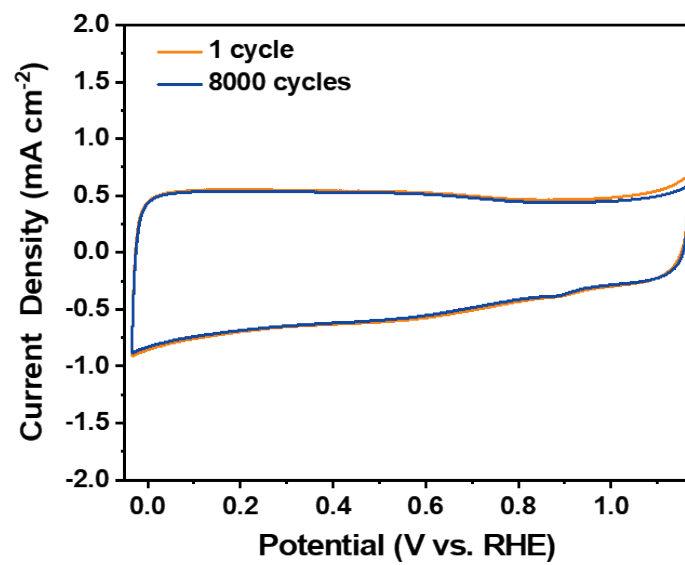

**Figure S12.** CV curves different CV cycles in an N<sub>2</sub>-saturated 0.1M KOH aqueous solution.

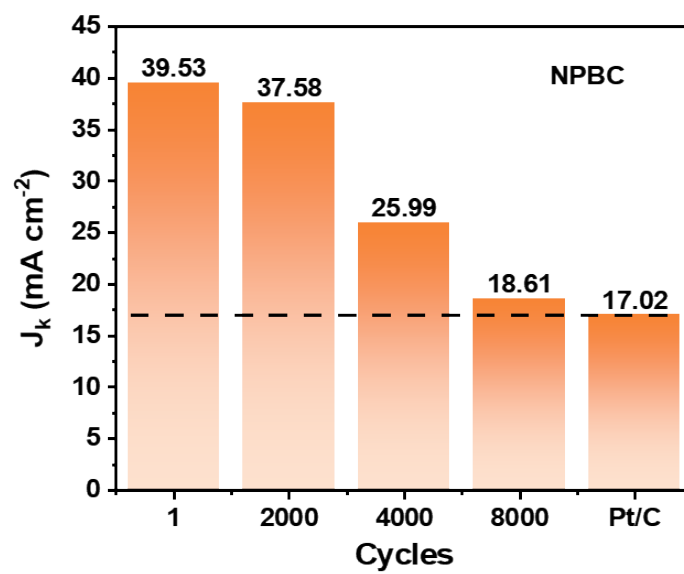

**Figure S13.** The kinetic current density ( $J_k$ ) calculated after ADT.

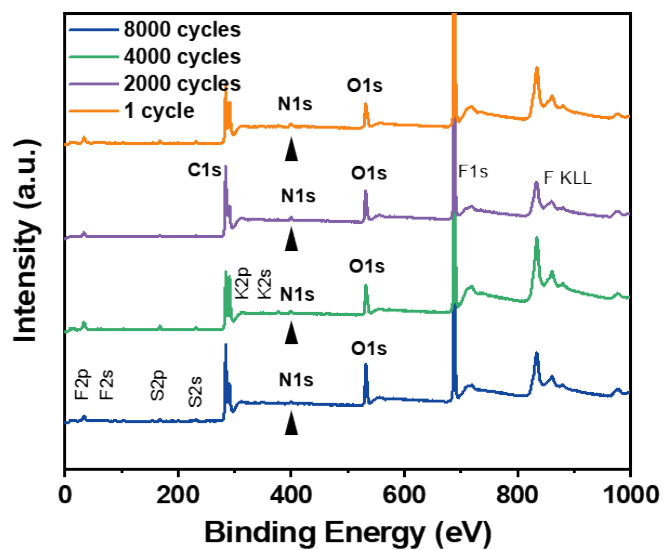

**Figure S14.** XPS survey spectra of NPBC after different cycles of CV scans. (C, N, and O elements can be clearly identified, while F, S, and K elements may come from residual Nafion and KOH).

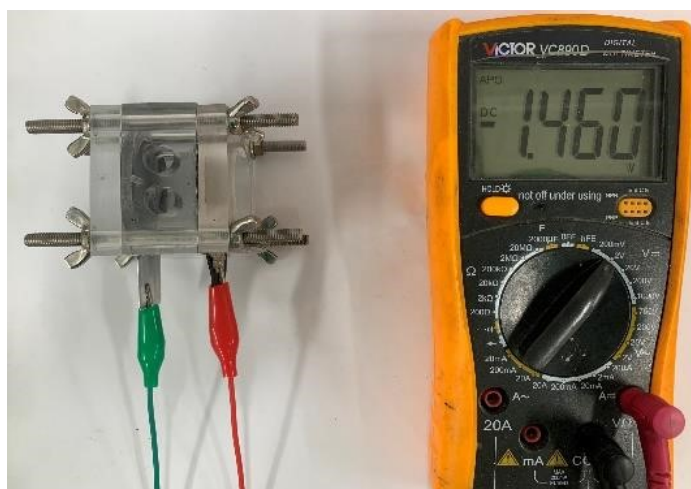

**Figure S15.** Image of the ZAB with a measure open-circuit voltage of 1.46 V.



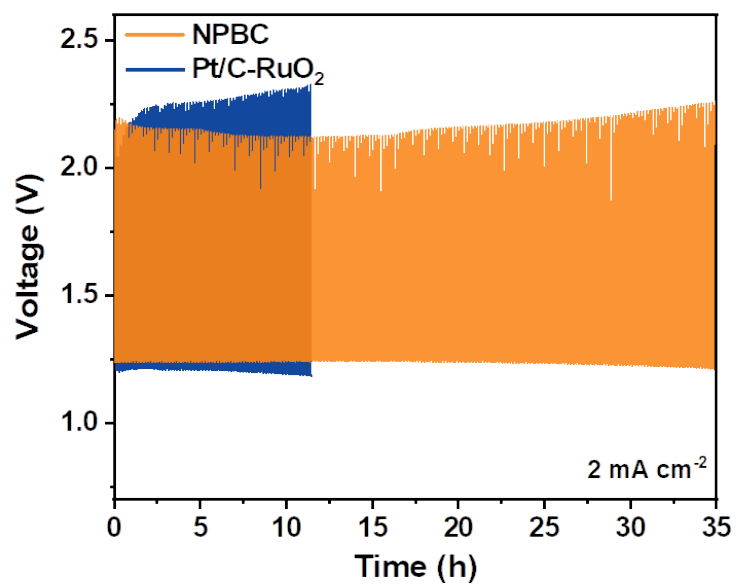

**Figure S16.** Charge-discharge curves cycling curves of ZABs with NPBC and Pt/C+RuO<sub>2</sub> at 2 mA cm<sup>-2</sup>.

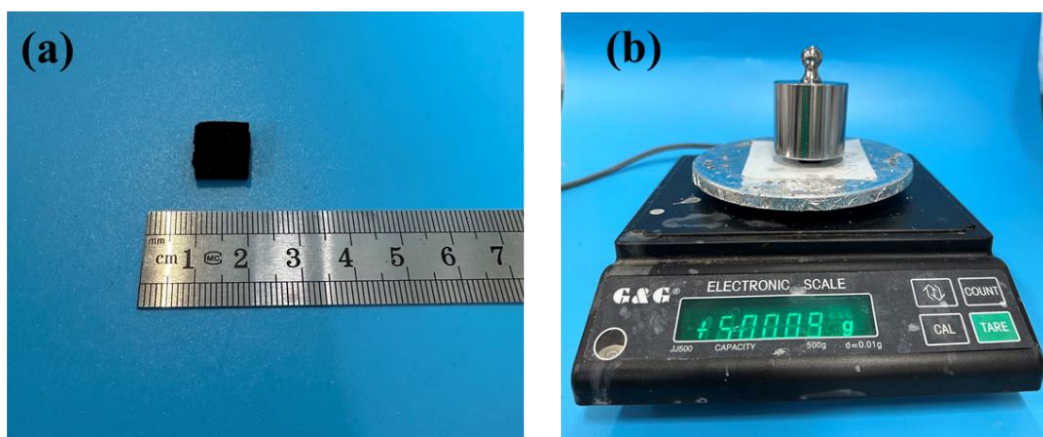

**Figure S17.** (a) Digital photographs of NPBC in the size of 1\*1\*0.4 cm, and (b) its image supporting 500g of weight.

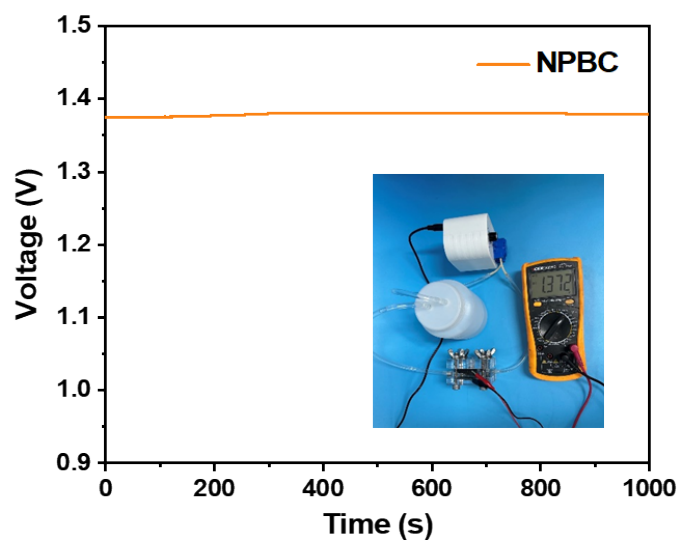

**Figure S18.** Open-circuit curve and image (insert) of the liquid flow ZABs with NPBC.

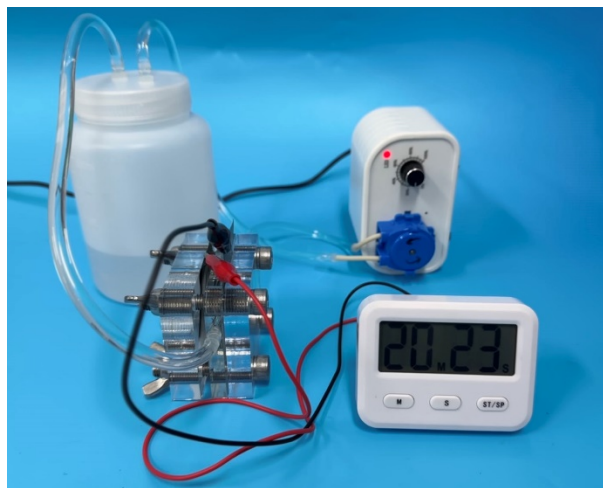

**Figure S19.** An electronic clock powered by a liquid flow ZAB.

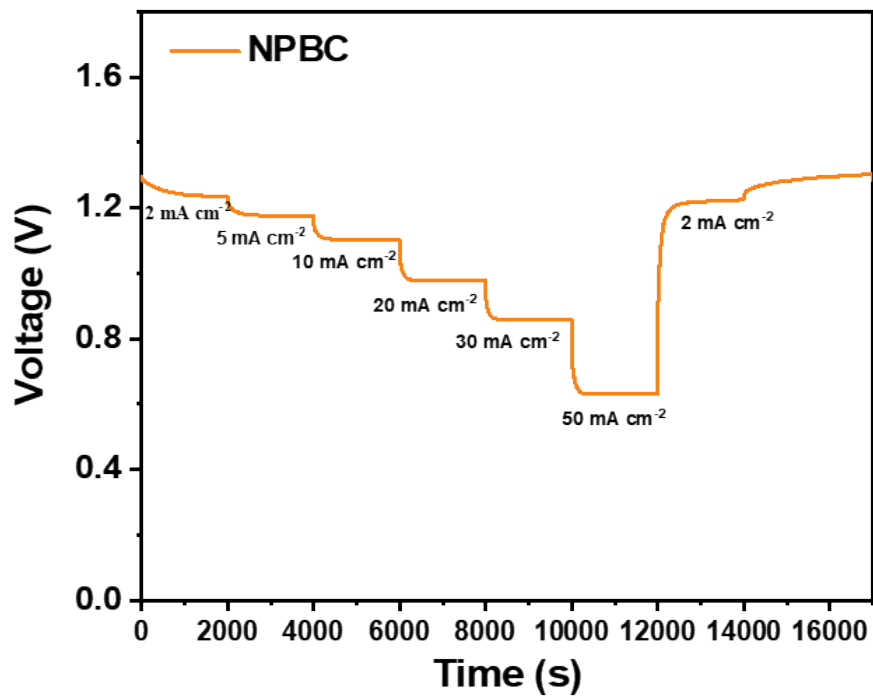

**Figure S20.** Galvanostatic discharge curves of the liquid flow ZAB with NPBC.

**Table S1.** Specific surface area (SSA) and pore structure of all samples.

| Sample | S <sub>BET</sub> (m <sup>2</sup> g <sup>-1</sup> ) | Pore volume (cm <sup>3</sup> g <sup>-1</sup> ) | Pore diameter (nm) |
|--------|----------------------------------------------------|------------------------------------------------|--------------------|
| BC     | 479.99                                             | 0.20                                           | 1.66               |
| NBC    | 532.21                                             | 0.21                                           | 1.62               |
| NPBC   | 745.12                                             | 0.51                                           | 2.72               |

**Table S2.** Elemental contents of samples obtained from XPS.

| Sample | Atomic content (%) |      |             |            |             |            |       |
|--------|--------------------|------|-------------|------------|-------------|------------|-------|
|        | C                  | O    | N           |            |             |            | Total |
|        |                    |      | Pyridinic-N | Pyrrolic-N | Graphitic-N | Oxidized-N |       |
| BC     | 91.68              | 8.32 | —           | —          | —           | —          | —     |
| NBC    | 89.31              | 7.98 | 0.52        | 0.73       | 0.73        | 0.74       | 2.72  |
| NPBC   | 86.54              | 9.71 | 0.88        | 0.89       | 1.08        | 0.88       | 3.75  |

**Table S3.** Summary of the reported ORR performance of NC-MFCs electrocatalysts.

| Catalyst                                | E <sub>onset</sub> | E <sub>1/2</sub> | Ref.             |
|-----------------------------------------|--------------------|------------------|------------------|
| NPBC                                    | 0.98               | 0.864            | <b>This work</b> |
| NBCNT-10                                | 0.958              | 0.82             | 1                |
| NCF                                     | 1.0                | 0.85             | 2                |
| NPCS-900                                | 0.99               | 0.87             | 3                |
| CNS                                     | 0.97               | 0.87             | 4                |
| N-CNF<br>aerogel                        | -                  | 0.80             | 5                |
| HPNSC                                   | 0.98               | 0.87             | 6                |
| PyN-GDY                                 | 1.0                | 0.84             | 7                |
| N-S-Cs-900                              | -                  | 0.84             | 8                |
| ND-GLC                                  | 0.991              | 0.875            | 9                |
| S-g-C <sub>3</sub> N <sub>4</sub> /P123 | -                  | 0.863            | 10               |



**Table S4.** Summary of the reported ORR and OER performance of NC-MFCs electrocatalysts.

| Catalyst                           | $E_{1/2}$ | $E_{j=10}$ | $\Delta E$<br>( $E_{j=10} - E_{1/2}$ ) | Ref.             |
|------------------------------------|-----------|------------|----------------------------------------|------------------|
| NPBC                               | 0.864     | 1.644      | 0.780                                  | <b>This work</b> |
| NSP-Gra                            | 0.82      | 1.76       | 0.94                                   | 11               |
| CA-1/10-<br>900°C                  | 0.821     | 1.757      | 0.936                                  | 12               |
| HHPC                               | 0.78      | 1.58       | 0.80                                   | 13               |
| P,S-CNS                            | 0.87      | 1.56       | 0.69                                   | 14               |
| PS-CNF                             | 0.86      | 1.55       | 0.69                                   | 15               |
| NKCNP <sub>s</sub> -<br>900        | 0.79      | 1.71       | 0.92                                   | 16               |
| NPF-CNS-2                          | 0.81      | 1.57       | 0.76                                   | 17               |
| BRC <sub>AC</sub> 850 <sub>2</sub> | 0.85      | 1.68       | 0.83                                   | 18               |
| CNT@NSC                            | 0.82      | 1.56       | 0.74                                   | 19               |
| NPCNF <sub>s</sub> -O              | 0.85      | 1.566      | 0.716                                  | 20               |

## REFERENCES

1. P. Wei, X. Li, Z. He, X. Sun, Q. Liang, Z. Wang, C. Fang, Q. Li, H. Yang, and J. Han, *Chem. Eng. J.*, 2021, **422**, 130134.
2. L. Zhang, T. Gu, K. Lu, L. Zhou, D. S. Li, and R. Wang, *Adv. Funct. Mater.*, 2021, **31**, 2103187.
3. G. Ren, S. Chen, J. Zhang, N. Zhang, C. Jiao, H. Qiu, C. Liu and H. L. Wang, *J. Mater. Chem. A*, 2021, **9**, 5751-5758.
4. S. Cao, W. Shang, G. L. Li, Z. F. Lu, X. Wang, Y. Yan, C. Hao, S. Wang and G. Sun, *Carbon*, 2021, **184**, 127-135.
5. H. W. Liang, Z. Y. Wu, L. F. Chen, C. Li and S. H. Yu, *Nano Energy*, 2015, **11**, 366-376.
6. Y. Cheng, Y. Wang, Q. Wang, Z. Liao, N. Zhang, Y. Guo and Z. Xiang, *J. Mater. Chem. A*, 2019, **7**, 9831-9836.
7. Q. Lv, N. Wang, W. Si, Z. Hou, X. Li, X. Wang, F. Zhao, Z. Yang, Y. Zhang and Huang, *C. Appl. Catal. B*, 2020, **261**, 118234.
8. L. Xing, C. Song and A. Kong, *J. Solid State Chem.*, 2020, **287**, 121348.
9. J. Zhang, Y. Sun, J. Zhu, Z. Kou, P. Hu, L. Liu, S. Li, S. Mu and Y. Huang, *Nano Energy*, 2018, **52**, 307-314.
10. X. B. Ding, F. Li, Q. C. Cao, H. Wu, Y. H. Qin, L. Yang, T. Wang, X. Zheng and C. W. Wang, *Chem. Eng. J.*, 2022, **429**, 132469.
11. Y. Wang, N. Xu, R. He, L. Peng, D. Cai and J. Qiao, *Large-scale Appl. Catal. B-Environ*, 2021, **285**, 119811.
12. H. Yabu, K. Ishibashi, M. S. Grewal, Y. Matsuo, N. Shoji and K. Ito, *Sci. Technol. Adv Mater.*, 2022, **23**, 31-40.
13. X. Xiao, X. Li, Z. Wang, G. Yan, H. Guo, Q. Hu, L. Li, Y. Liu and J. Wang, *Appl. Catal. B-Environ.*, 2020, **265**, 118603.
14. S. S. Shinde, C. H. Lee, A. Sami, D. H. Kim, S. U. Lee and J. H. Lee, *ACS nano*, 2017, **11**, 347-357.
15. S. S. Shinde, J. Y. Yu, J. W. Song, Y. H. Nam, D. H. Kim and J. H. Lee, *Nanoscale Horiz.*, 2017, **2**, 333-341.
16. Q. Wang, Y. Lei, Y. Zhu, H. Wang, J. Feng, G. Ma, Y. Wang, Y. Li, B. Nan and Q. Feng, *ACS appl. Mater. Interfaces*, 2018, **10**, 29448-29456.
17. Y. Zheng, H. Song, S. Chen, X. Yu, J. Zhu, J. Xu, K. A. Zhang, C. Zhang and T. Liu, *Small*, 2020, **16**, 2004342.
18. Q. Li, T. He, Y. Q. Zhang, H. Wu, J. Liu, Y. Qi, Y. Lei, H. Chen, Z. Sun and C. Peng, *ACS Sustainable Chem. Eng.*, 2019, **7**, 17039-17046.
19. X. Wang, G. L. Li, Z. F. Lu, S. Cao, C. Hao, S. Wang and G. Sun, *Catal. Sci. Technol.*, 2022, **12**, 181-191.
20. F. Qiang, J. Feng, H. Wang, J. Yu, J. Shi, M. Huang, Z. Shi, S. Liu, P. Li and L. Dong, *ACS Catal.*, 2022, **12**, 4002-4015.
